# Supplementary material for: Diagnostic Value of Combining Tumor and Inflammatory Markers in Lung Cancer
Source: PubMed Central journal article supplement — J Cancer Prev. 2016 Sep 30;21(3):187–93. doi: 10.15430/JCP.2016.21.3.187 (PMC5051593; doi:10.15430/jcp.2016.21.3.187), 2016-09-30
Supplement: JCP-21-187_suppl.4.pdf [file JCP-21-187_suppl.4.pdf]

Supplement 4-1. AUC comparison of training data set according to early vs late stages

|                                            | AUC         | Number of cases | AUC   | Probability |
|--------------------------------------------|-------------|-----------------|-------|-------------|
| CEA, HE4                                   | Stage 1 & 2 | 176             | 0.812 | 1.54E-35    |
|                                            | Stage 3 & 4 | 104             | 0.928 | 1.79E-43    |
| RANTES, ApoA1, TTR, Svcam-1                | Stage 1 & 2 | 176             | 0.96  | 9.89E-75    |
|                                            | Stage 3 & 4 | 104             | 0.971 | 2.77E-52    |
| CEA, HE4, RANTES, ApoA2, TTR, Svcam-1      | Stage 1 & 2 | 176             | 0.976 | 7.59E-80    |
|                                            | Stage 3 & 4 | 104             | 0.993 | 4.45E-57    |
| CEA, HE4, RANTES, ApoA2, TTR, Svcam-1, age | Stage 1 & 2 | 176             | 0.982 | 1.39E-81    |
|                                            | Stage 3 & 4 | 104             | 0.994 | 2.31E-57    |

Supplement 4-2. AUC comparison of training data set according to 1 vs. 2 vs. 3 vs. 4 stage

|                                            | AUC     | Number of cases | AUC   | probability |
|--------------------------------------------|---------|-----------------|-------|-------------|
| CEA, HE4                                   | Stage 1 | 145             | 0.793 | 2.17E-27    |
|                                            | Stage 2 | 31              | 0.905 | 1.86E-14    |
|                                            | Stage 3 | 44              | 0.873 | 1.01E-16    |
|                                            | Stage 4 | 60              | 0.968 | 8.03E-33    |
| RANTES, ApoA1, TTR, Svcam-1                | Stage 1 | 145             | 0.956 | 1.13E-63    |
|                                            | Stage 2 | 31              | 0.979 | 1.57E-19    |
|                                            | Stage 3 | 44              | 0.957 | 3.89E-24    |
|                                            | Stage 4 | 60              | 0.982 | 1.19E-34    |
| CEA, HE4, RANTES, ApoA2, TTR, Svcam-1      | Stage 1 | 145             | 0.973 | 3.64E-68    |
|                                            | Stage 2 | 31              | 0.993 | 1.40E-20    |
|                                            | Stage 3 | 44              | 0.987 | 3.94E-27    |
|                                            | Stage 4 | 60              | 0.998 | 6.86E-37    |
| CEA, HE4, RANTES, ApoA2, TTR, Svcam-1, age | Stage 1 | 145             | 0.978 | 9.93E-70    |
|                                            | Stage 2 | 31              | 0.997 | 6.91E-21    |
|                                            | Stage 3 | 44              | 0.989 | 2.38E-27    |
|                                            | Stage 4 | 60              | 0.999 | 5.57E-37    |
